# Supplementary material for: Di-valent siRNA-mediated silencing of MSH3 blocks somatic repeat expansion in mouse models of Huntington’s disease
Source: PubMed Central journal article supplement (PMC10277892; doi:10.1016/j.ymthe.2023.05.006), 2023-05-12
Supplement: mmc1.pdf [file mmc1.pdf]

## **Supplemental Information**

### **Di-valent siRNA-mediated silencing of MSH3**

#### **blocks somatic repeat expansion in mouse**

#### **models of Huntington's disease**

**Daniel O'Reilly, Jillian Belgrad, Chantal Ferguson, Ashley Summers, Ellen Sapp, Cassandra McHugh, Ella Mathews, Adel Boudi, Julianna Buchwald, Socheata Ly, Dimas Moreno, Raymond Furgal, Eric Luu, Zachary Kennedy, Vignesh Hariharan, Kathryn Monopoli, X. William Yang, Jeffery Carroll, Marian DiFiglia, Neil Aronin, and Anastasia Khvorova**

SUPPLEMENTAL MATERIALS

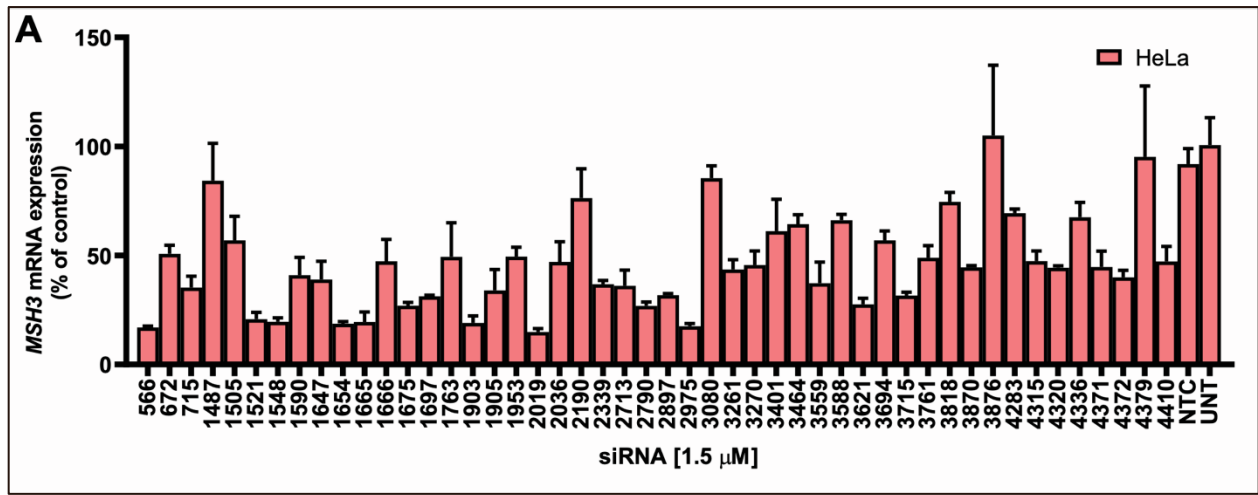

**Figure S1: Identification of potent siRNA targeting *Msh3*.** *In vitro* screen results for various MSH3-targeting sequences, aligned by 5'-3' location across the target gene. HeLa cells treated 1.5  $\mu$ M siRNA for 72 hours. mRNA quantified with Quantigene assay and *Msh3* expression represented as abundance normalized to HPRT and relative to NTC.

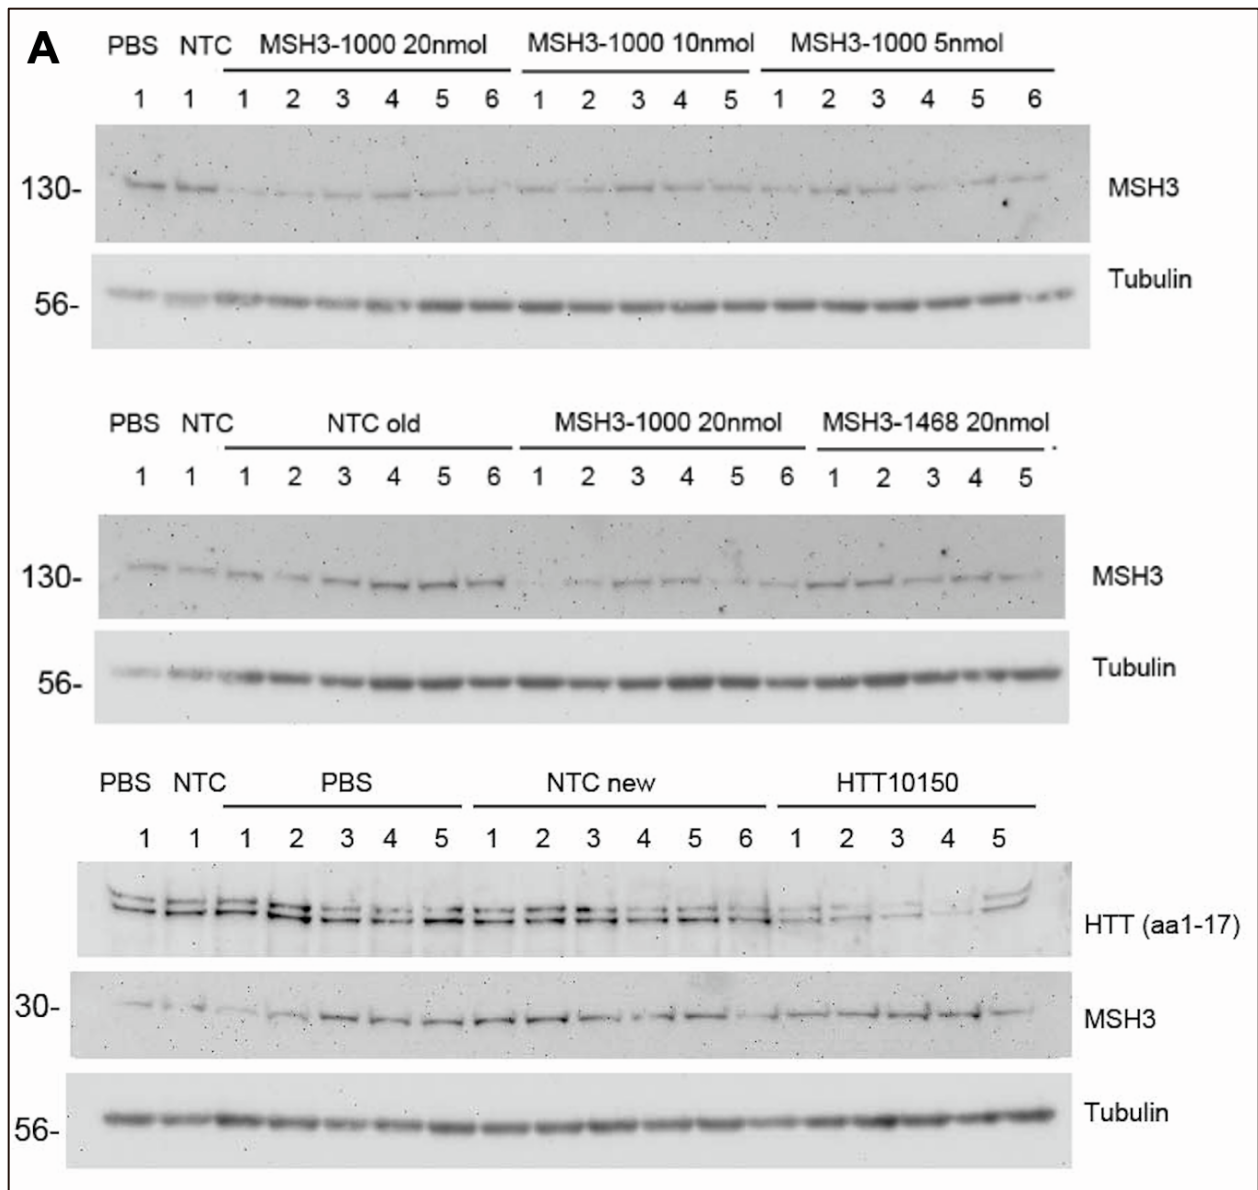

**Figure S2: MSH3\_1000 silences MSH3 *in vivo* two months post ICV injection in Hdh<sup>Q111</sup> HD mice.** Western blots used to quantify MSH3 and HTT protein expression in treated mice. HTT and MSH3 expression normalized to tubulin loading control. Treatment group listed above each section. Molecular weight of target band reported on left. Western blot conditions reported in methods.

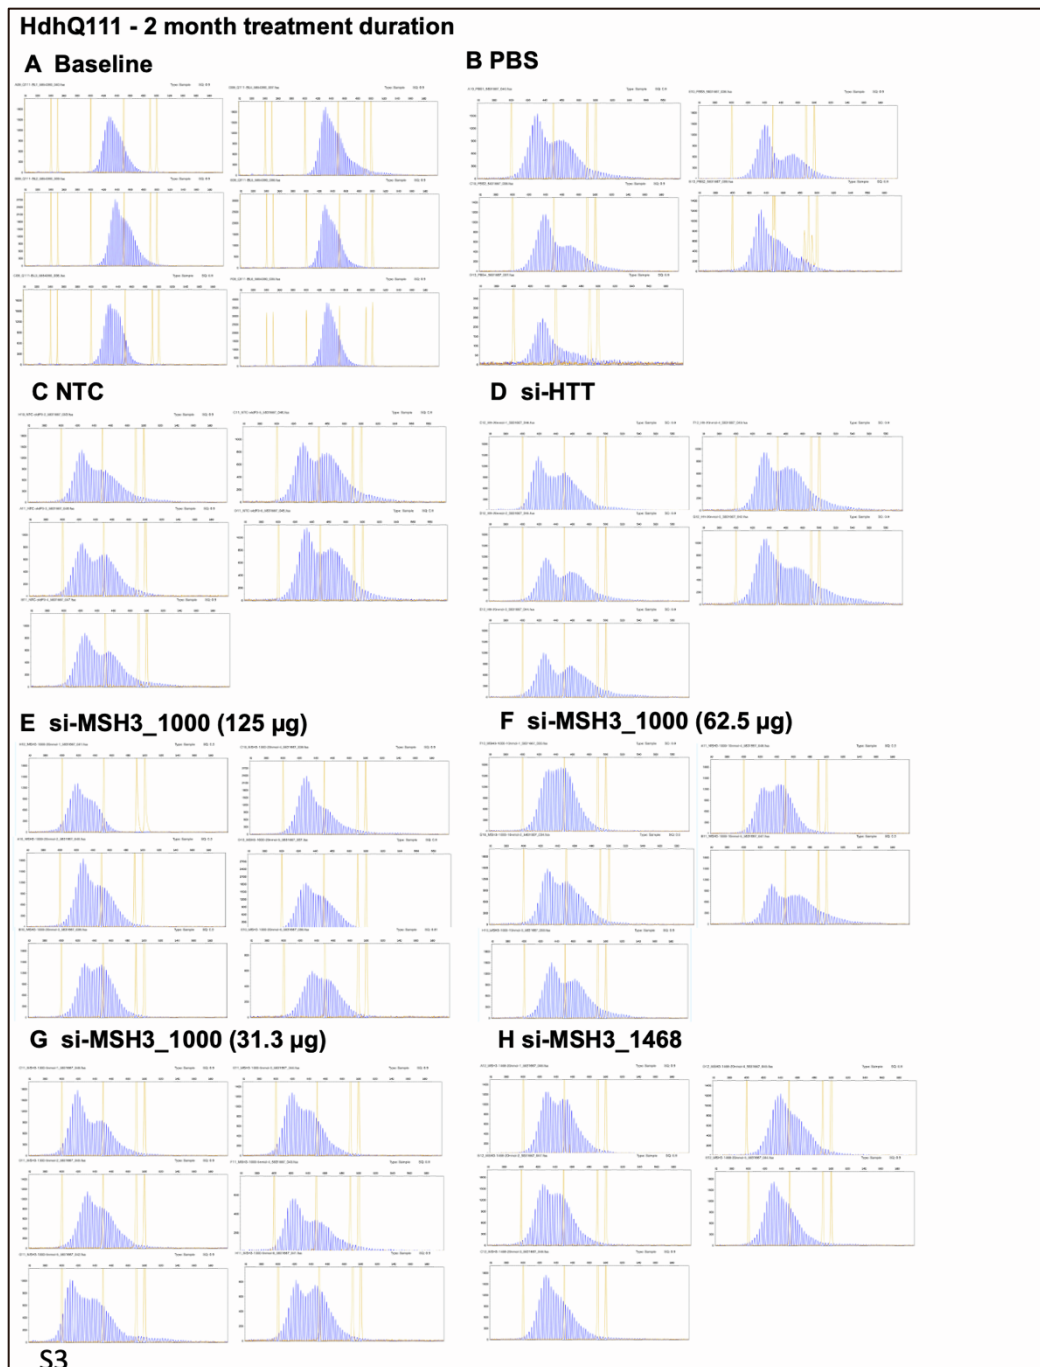

**Figure S3: Fragment analysis traces indicate that siMSH3 blocks somatic repeat expansion in Hdh<sup>Q111</sup> following two-month treatment.** Fragment analysis traces used to quantify somatic repeat expansion instability index for (A) Baseline, (B) PBS, (C) NTC, (D) si-Htt (E) siMSH3\_1000 (125 µg) (F) siMSH3\_1000 (62.5 µg) (G) siMSH3\_1000 (31.3 µg) (H) ssiMSH3\_1468 (125 µg). X-axis of each chart is fragment length (base pairs). Y-axis is relative fluorescence units normalized to region of interest height. Orange lines are fragment ladders.

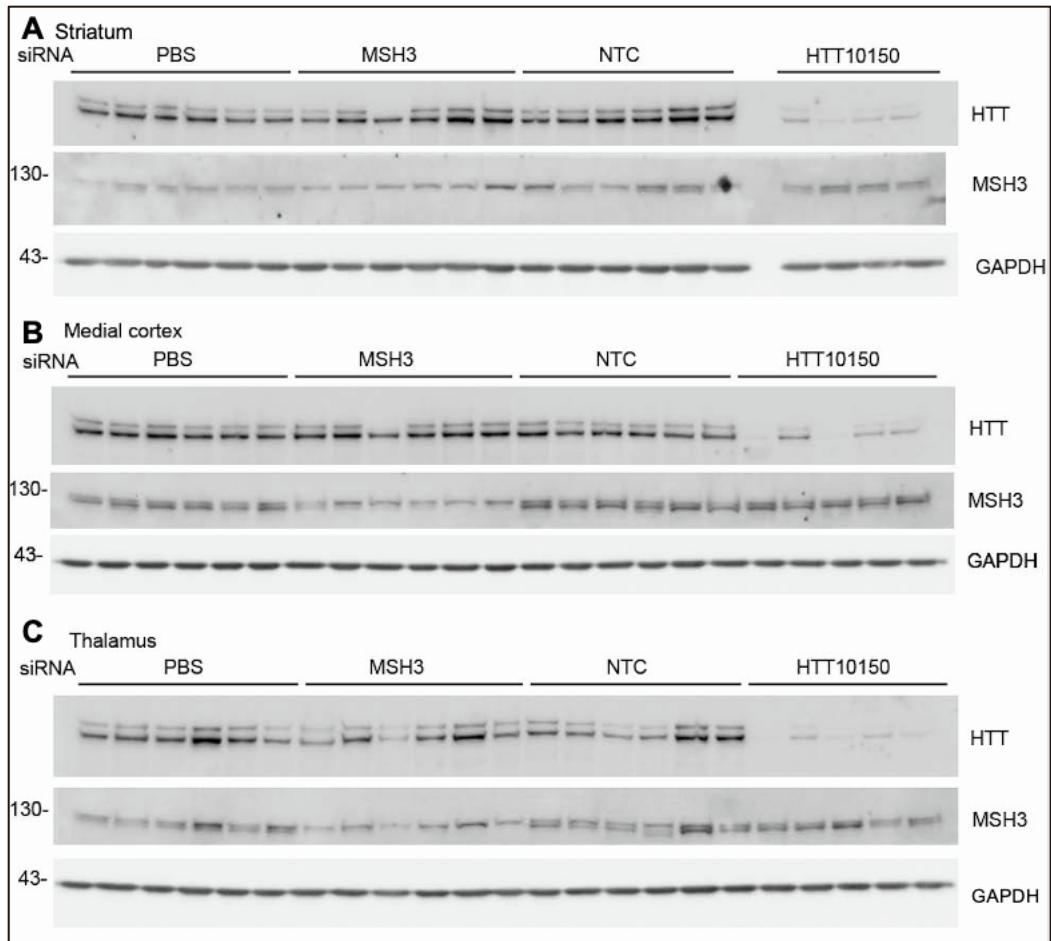

**Figure S4: MSH3\_1000 silences MSH3 *in vivo* two months post ICV injection in BAC-CAG HD mice.** Western blots used to quantify MSH3 and HTT protein expression in (A) striatum, (B) medial cortex, (C) and thalamus. HTT and MSH3 expression normalized to GAPDH loading control. Treatment group listed above each section. Molecular weight of target band reported on left. Western blot conditions reported in methods.

## BAC-CAG – 2 month treatment duration

### A Baseline

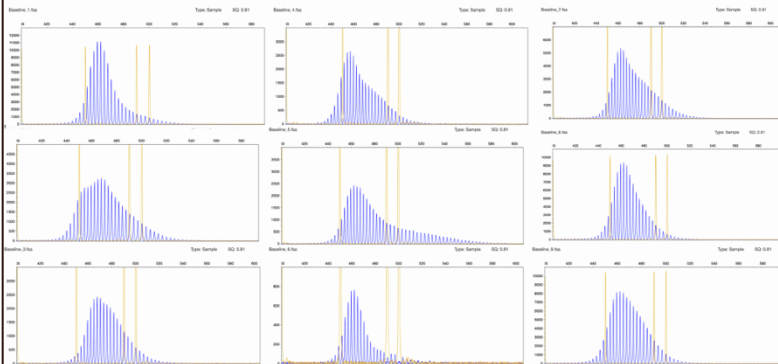

### B PBS

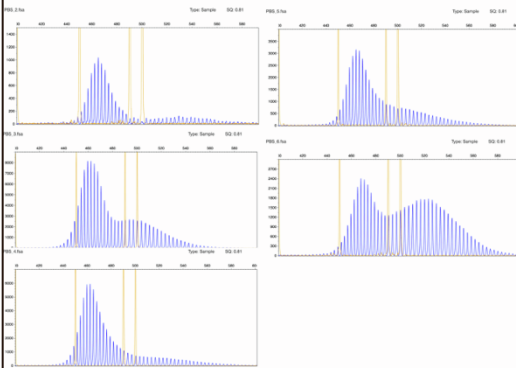

### C NTC

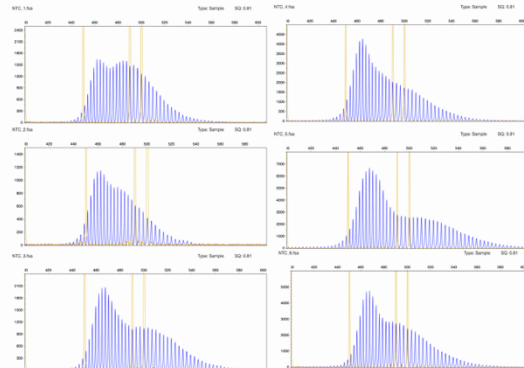

### D si-MSH3\_1000

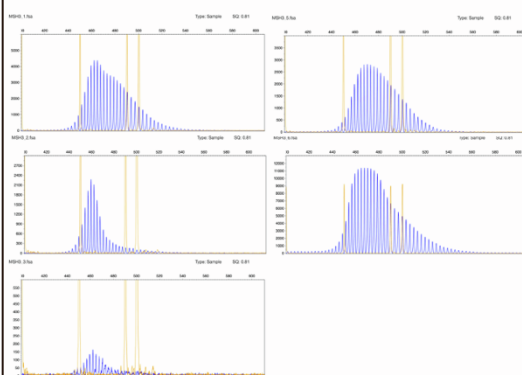

### E si-HTT

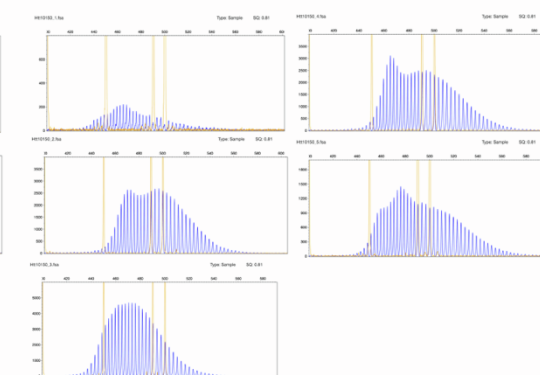

S5

**Figure S5: Fragment analysis traces indicate that siMSH3 blocks somatic repeat expansion in BAC-CAG following two-month treatment.** Fragment analysis traces used to quantify somatic repeat expansion instability index for (A) Baseline, (B) PBS, (C) NTC, (D) siMSH3\_1000 (E) si-Htt. X-axis of each chart is fragment length (base pairs). Y-axis is the relative fluorescence units normalized to region of interest height. Orange lines are fragment ladders.

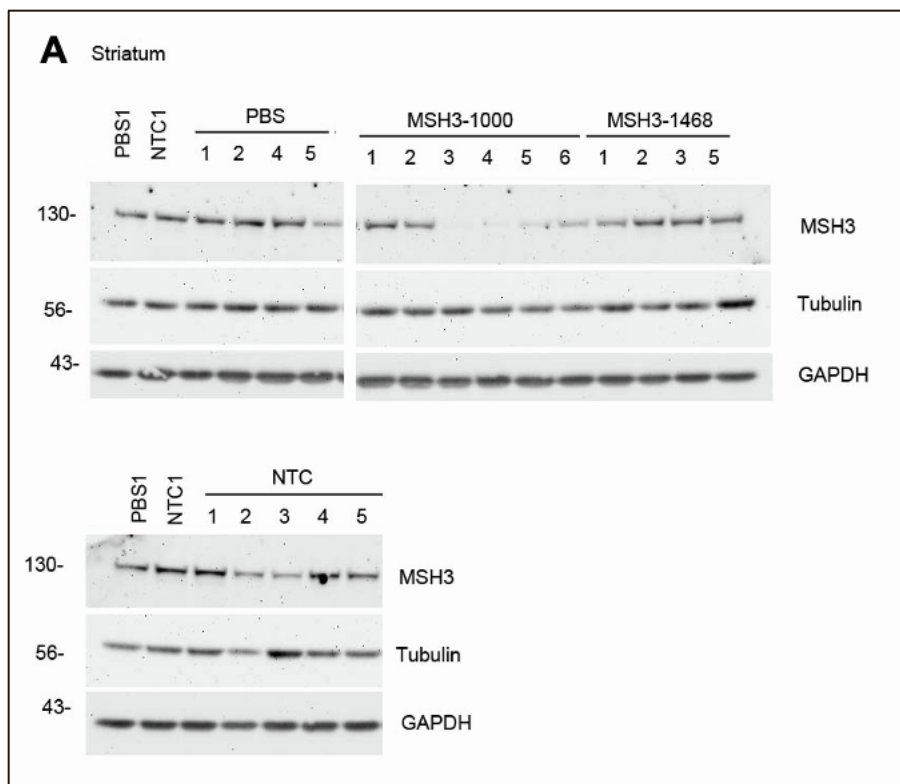

**Figure S6: MSH3 targeting siRNA induce silencing *in vivo* four months post ICV injection in BAC-CAG HD mice.** Western blots used to quantify MSH3 and HTT protein expression in (A) striatum. MSH3 expression normalized to GAPDH loading control. Tubulin used as an additional control. Treatment group listed above each section. Molecular weight of target band reported on left. Western blot conditions reported in methods.

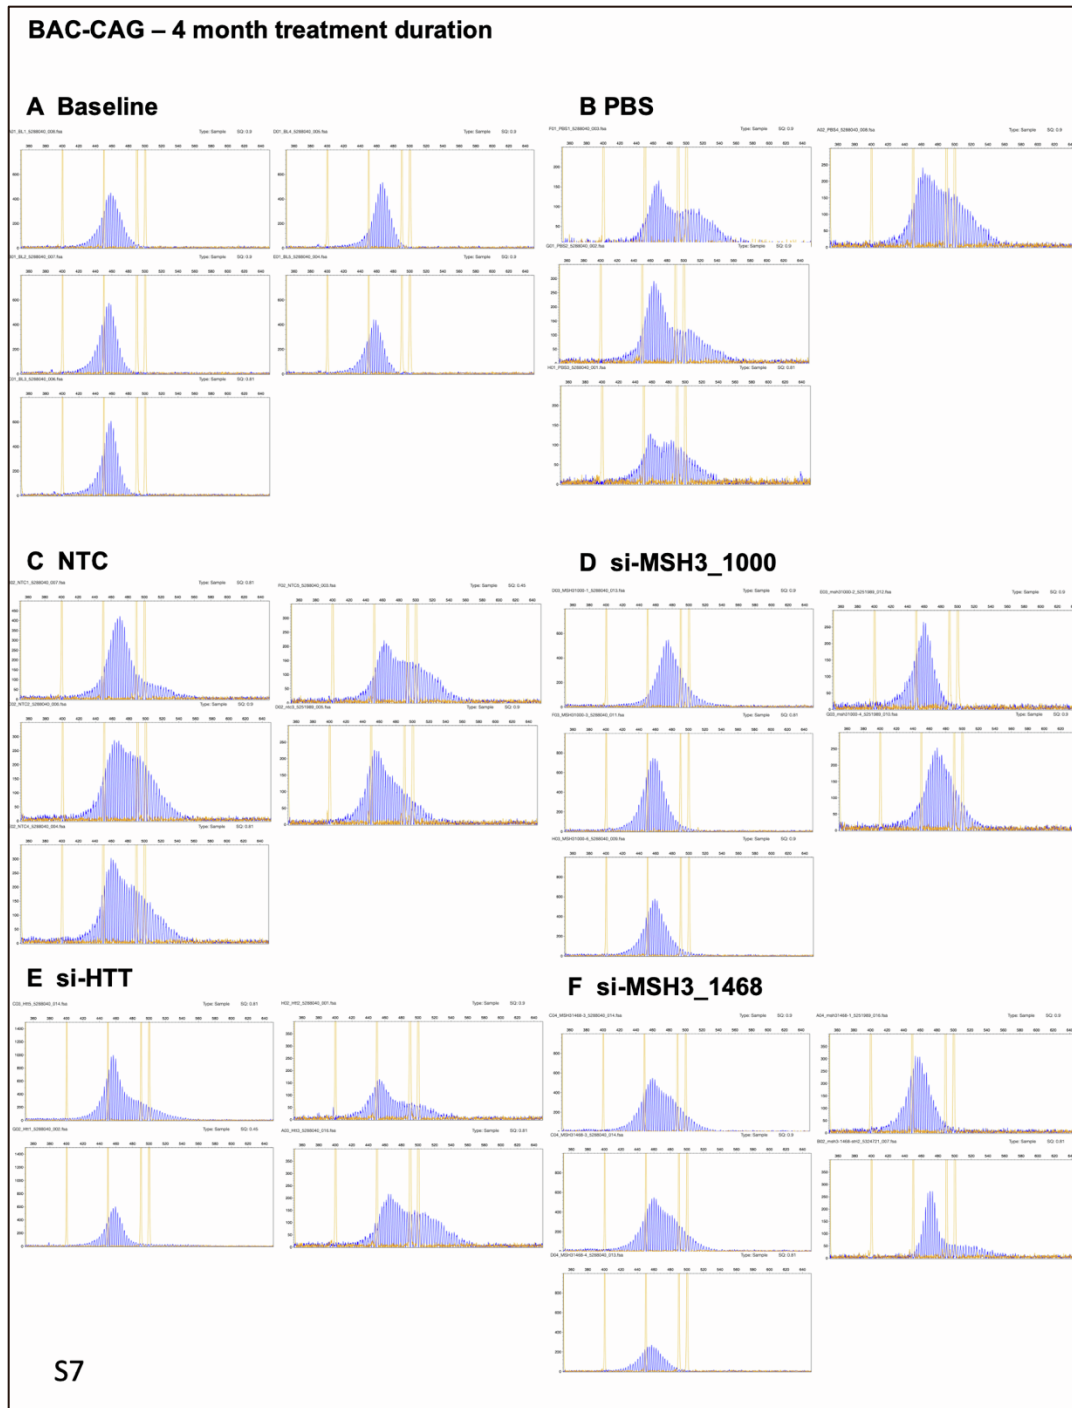

**Figure S7: Fragment analysis traces indicate that siMSH3 blocks somatic repeat expansion in BAC-CAG following four-month treatment.** Fragment analysis traces used to quantify somatic repeat expansion instability index for (A) Baseline, (B) PBS, (C) NTC, (D) siMSH3\_1000, (E) si-Htt, (F) siMSH3\_1468. X-axis of each chart is fragment length (base pairs). Y-axis is the relative fluorescence units normalized to region of interest height. Orange lines are fragment ladders.



**Table S1: Summary of siRNA chemistries used for *in vitro* and *in vivo* studies**

| Compound  | Guide strand chemistry (5'-3')                                                                         | Passenger strand chemistry (5'-3')                                           |
|-----------|--------------------------------------------------------------------------------------------------------|------------------------------------------------------------------------------|
| MSH3_885  | P(mU)#(fG)#(mG)(fC)(fA)(fA)(mU)(fA)(mA)(fA)(mU)(fA)(mU)#(fU)#(mG)#(fA)#(mG)#(mC)#(mU)#(fC)             | (mC)#(mA)#(fA)(mU)(fA)(mU)(fU)(mU)(fA)(mU)(mU)(mG)(fC)#(mC)#(mA)-TegChol     |
| MSH3_993  | P(mU)#(fC)#(mA)(fG)(fU)(fU)(mU)(fG)(mC)(fU)(mU)(fC)(mA)#(fC)#(mA)#(fA)#(mC)#(mU)#(mC)#(fC)             | (mU)#(mG)#(fU)(mG)(fA)(mA)(fG)(mC)(fA)(mA)(mA)(mC)(fU)#(mG)#(mA)-TegChol     |
| MSH3_1000 | P(mU)#(fG)#(mC)(fA)(fG)(fU)(mU)(fU)(mC)(fA)(mG)(fU)(mU)#(fU)#(mG)#(fC)#(mU)#(mU)#(mC)#(fA)             | (mC)#(mA)#(fA)(mA)(fC)(mU)(fG)(mA)(fA)(mA)(mC)(mU)(fG)#(mC)#(mA)-TegChol     |
| MSH3_1468 | P(mU)#(fA)#(mA)(fA)(fG)(fC)(mA)(fU)(mG)(fG)(mC)(fU)(mG)(fU)#(mA)#(fU)#(mU)#(mC)#(mA)#(fA)              | (mU)#(mA)#(fC)(mA)(fG)(mC)(fC)(mA)(fU)(mG)(mC)(mU)(fU)#(mU)#(mA)-TegChol     |
| MSH3_1763 | P(mU)#(fA)#(mG)(fU)(fG)(fU)(mG)(fG)(mU)(fC)(mU)(fA)(mA)#(fA)#(mA)#(fC)#(mC)#(mC)#(mA)#(fC)             | (mU)#(mU)#(fU)(mG)(fA)(mC)(fC)(mA)(mC)(mA)(fC)#(mU)#(mA)-TegChol             |
| MSH3_1953 | P(mU)#(fU)#(mG)(fU)(fG)(fA)(mU)(fA)(mA)(fA)(mU)(fG)(mC)#(fU)#(mA)#(fC)#(mA)#(mG)#(mA)#(fG)             | (mU)#(mA)#(fG)(mC)(fA)(mU)(fU)(mU)(fA)(mU)(mC)(mA)(fC)#(mA)#(mA)-TegChol     |
| MSH3_2048 | P(mU)#(fG)#(mU)(fG)(fA)(fA)(mU)(fU)(mA)(fA)(mC)#(fA)#(mG)#(fC)#(mA)#(mG)#(mG)#(fU)                     | (mC)#(mU)#(fG)(mU)(fU)(mA)(fA)(mU)(fU)(mC)(mC)(mC)(fA)#(mC)#(mA)-TegChol     |
| MSH3_2170 | P(mU)#(fA)#(mA)(fU)(fA)(fA)(mU)(fU)(mC)(fA)(mG)(fU)(mU)#(fU)#(mU)#(fA)#(mU)#(mC)#(mC)#(fC)             | (mA)#(mA)#(fA)(mA)(fC)(mU)(fG)(mA)(fA)(mU)(mU)(mA)(fU)#(mU)#(mA)-TegChol     |
| MSH3_2204 | P(mU)#(fC)#(mU)(fU)(fU)(fU)(mU)(fU)(mA)(fU)(mA)#(fA)#(mG)#(fG)#(mG)#(mA)#(mA)#(fG)                     | (mC)#(mU)#(fU)(mU)(fA)(mA)(fU)(mA)(fA)(mA)(mA)(mA)(fA)#(mG)#(mA)-TegChol     |
| MSH3_2397 | P(mU)#(fG)#(mG)(fC)(fU)(fC)(mA)(fC)(mA)(fG)(mC)(fU)(mU)#(fU)#(mU)#(fG)#(mU)#(mG)#(mC)#(fU)             | (mA)#(mA)#(fA)(mA)(fG)(mC)(fU)(mG)(fU)(mG)(mA)(mG)(fC)#(mC)#(mA)-TegChol     |
| MSH3_2675 | P(mU)#(fC)#(mA)(fG)(fC)(fA)(mA)(fC)(mA)(fC)(mA)(fU)(mC)#(fA)#(mA)#(fU)#(mC)#(mA)#(mC)(fA)              | (mU)#(mU)#(fG)(mA)(fU)(mG)(fU)(mG)(fU)(mU)(mG)(mC)(fU)#(mG)#(mA)-TegChol     |
| MSH3_2897 | P(mU)#(fU)#(mA)(fG)(fA)(fA)(mU)(fG)(mU)(fC)(mU)(fG)(mC)#(fA)#(mG)#(fC)#(mA)#(mC)#(mC)#(fC)             | (mC)#(mU)#(fG)(mC)(fA)(mG)(fA)(mC)(fA)(mA)(mU)(mA)(fU)#(mA)#(mA)-TegChol     |
| MSH3_566  | P(mU)#(fA)#(mU)(fC)(fA)(fG)(mU)(fA)(mC)(fA)(mU)(fU)(mU)(fU)#(mG)#(fG)#(mC)#(mA)#(mG)#(fA)#(mU)         | (mC)#(mC)#(mA)(fA)(mA)(fA)(mU)(fG)(mU)(fA)(mC)(mU)(mG)(fA)#(mU)#(mA)-TegChol |
| MSH3_672  | P(mU)#(fC)#(mA)(fA)(fA)(fC)(mU)(fG)(mA)(fC)(mA)(fG)#(mA)#(fU)#(mC)#(mA)#(mA)#(fA)#(mU)                 | (mA)#(mU)#(mC)(fU)(mC)(fA)(mG)(fU)(mC)(fA)(mG)(mU)(mU)(fU)#(mG)#(mA)-TegChol |
| MSH3_715  | P(mU)#(fG)#(mA)(fA)(fG)(fC)(mA)(fG)(mU)(fU)(mU)(fU)(mC)(fU)#(mG)#(fU)#(mA)#(mA)#(mA)#(fU)#(mU)         | (mA)#(mC)#(mA)(fG)(mA)(fA)(mA)(fA)(mC)(fU)(mG)(mC)(mU)(fU)#(mC)#(mA)-TegChol |
| MSH3_1452 | P(mU)#(fC)#(mA)(fA)(fA)(fA)(mU)(fA)(mA)(fA)(mU)(fG)(mU)(fU)#(mA)#(fU)#(mC)#(mU)#(mA)#(fA)#(mU)         | (mA)#(mU)#(mA)(fA)(mC)(fA)(mU)(fU)(mU)(fA)(mU)(mU)(fU)(fU)#(mG)#(mA)-TegChol |
| MSH3_1487 | P(mU)#(fA)#(mA)(fA)(fC)(fU)(mC)(fU)(mG)(fU)(mA)(fA)(mC)(fU)#(mG)#(fC)#(mC)#(mU)#(mG)#(fG)#(mU)         | (mG)#(mC)#(mA)(fG)(mU)(fU)(mA)(fC)(mA)(fG)(mA)(mG)(mU)(fU)#(mU)#(mA)-TegChol |
| MSH3_1505 | P(mU)#(fA)#(mA)(fC)(fU)(fG)(mU)(fA)(mU)(fC)(mU)(fU)(mU)(fU)#(mG)#(fC)#(mA)#(mU)#(mA)#(fA)#(mU)         | (mG)#(mC)#(mA)(fA)(mA)(fA)(mG)(fA)(mU)(fA)(mC)(mA)(mG)(fU)#(mU)#(mA)-TegChol |
| MSH3_1521 | P(mU)#(fU)#(mU)(fA)(fA)(fU)(mU)(fG)(mC)(fC)(mU)(fU)(mU)(fG)(mA)(fU)#(mG)#(fU)#(mC)#(mA)#(mA)#(fC)#(mU) | (mA)#(mC)#(mA)(fU)(mC)(fA)(mA)(fA)(mG)(fG)(mU)(mU)(mC)(fU)#(mC)#(mA)-TegChol |
| MSH3_1548 | P(mU)#(fC)#(mU)(fA)(fA)(fG)(mU)(fU)(mA)(fA)(mC)(fA)(mA)(fU)#(mG)#(fC)#(mC)#(mA)#(mG)#(fA)#(mU)         | (mG)#(mC)#(mA)(fU)(mU)(fG)(mU)(fU)(mA)(fA)(mC)(mU)(mU)(fA)#(mG)#(mA)-TegChol |
| MSH3_1590 | P(mU)#(fG)#(mG)(fU)(fA)(fU)(mU)(fG)(mU)(fA)(mU)(fG)(mA)(fU)#(mG)#(fG)#(mC)#(mA)#(mG)#(fC)#(mU)         | (mC)#(mC)#(mA)(fU)(mC)(fA)(mU)(fA)(mA)(fA)(mA)(mU)(mA)(fC)#(mC)#(mA)-TegChol |
| MSH3_1647 | P(mU)#(fA)#(mU)(fA)(fG)(fC)(mU)(fG)(mU)(fU)(mU)(fA)(mA)(fA)#(mA)#(fU)#(mU)#(mC)#(mU)#(fC)#(mU)         | (mA)#(mU)#(mU)(fU)(mU)(fA)(mA)(fA)(mC)(fA)(mG)(mC)(mU)(fA)#(mU)#(mA)-TegChol |
| MSH3_1654 | P(mU)#(fU)#(mU)(fA)(fC)(fU)(mU)(fG)(mA)(fU)(mA)(fG)(mC)(fU)#(mG)#(fU)#(mU)#(mU)#(mA)#(fA)#(mU)         | (mA)#(mC)#(mA)(fG)(mC)(fU)(mA)(fU)(mC)(fA)(mA)(mG)(mU)(fA)#(mA)#(mA)-TegChol |
| MSH3_1665 | P(mU)#(fU)#(mA)(fA)(fA)(fU)(mU)(fC)(mC)(fA)(mU)(fU)(mU)(fU)#(mA)#(fC)#(mU)#(mU)#(mG)#(fA)#(mU)         | (mG)#(mU)#(mA)(fA)(mA)(fA)(mU)(fG)(mG)(fA)(mA)(mU)(mU)(fU)#(mA)#(mA)-TegChol |
| MSH3_1666 | P(mU)#(fA)#(mU)(fA)(fA)(fA)(mU)(fU)(mC)(fC)(mA)(fU)(mU)(fU)#(mU)#(fA)#(mC)#(mU)#(mU)#(fG)#(mU)         | (mU)#(mA)#(mA)(fA)(mA)(fU)(mG)(fG)(mA)(fA)(mU)(mU)(mU)(fA)#(mU)#(mA)-TegChol |
| MSH3_1675 | P(mU)#(fU)#(mU)(fA)(fA)(fU)(mU)(fG)(mU)(fC)(mA)(fU)(mA)(fA)#(mA)#(fU)#(mU)#(mC)#(mC)#(fA)#(mU)         | (mA)#(mU)#(mU)(fU)(mA)(fU)(mG)(fA)(mC)(fA)(mA)(mU)(mU)(fA)#(mA)#(mA)-TegChol |
| MSH3_1697 | P(mU)#(fC)#(mA)(fG)(fA)(fU)(mU)(fC)(mC)(fU)(mU)(fA)(mA)(fU)#(mG)#(fU)#(mU)#(mG)#(mU)#(fU)#(mU)         | (mA)#(mC)#(mA)(fU)(mU)(fA)(mA)(fG)(mG)(fA)(mA)(mU)(mC)(fU)#(mG)#(mA)-TegChol |
| MSH3_1903 | P(mU)#(fU)#(mG)(fA)(fU)(fU)(mU)(fU)(mC)(fU)(mA)(fU)(mC)(fU)#(mG)#(fA)#(mC)#(mC)#(mA)#(fA)#(mU)         | (mU)#(mC)#(mA)(fG)(mA)(fU)(mA)(fG)(mA)(fA)(mA)(mA)(mU)(fC)#(mA)#(mA)-TegChol |
| MSH3_1905 | P(mU)#(fG)#(mA)(fU)(fG)(fA)(mU)(fU)(mU)(fU)(mC)(fU)(mA)(fU)#(mC)#(fU)#(mG)#(mA)#(mC)#(fC)#(mU)         | (mA)#(mG)#(mA)(fU)(mA)(fG)(mA)(fA)(mA)(fA)(mU)(mC)(mA)(fU)#(mC)#(mA)-TegChol |
| MSH3_1980 | P(mU)#(fA)#(mG)(fA)(fA)(fG)(mA)(fA)(mC)(fU)(mC)(fU)(fG)#(mG)#(fG)#(mU)#(mA)#(mG)#(fA)#(mU)             | (mC)#(mC)#(mC)(fA)(mA)(fG)(mA)(fG)(mU)(fU)(mC)(mU)(mU)(fC)#(mU)#(mA)-TegChol |
| MSH3_2019 | P(mU)#(fG)#(mA)(fA)(fA)(fU)(mU)(fC)(mU)(fG)(mA)(fC)(mU)(fU)#(mU)#(fA)#(mG)#(mG)#(mU)#(fG)#(mU)         | (mU)#(mA)#(mA)(fA)(mG)(fU)(mC)(fA)(mG)(fA)(mA)(mU)(mU)(fU)#(mC)#(mA)-TegChol |
| MSH3_2036 | P(mU)#(fA)#(mG)(fC)(fA)(fG)(mG)(fU)(mA)(fU)(mU)(fA)(mU)(fU)#(mG)#(fC)#(mU)#(mU)#(mG)#(fA)#(mU)         | (mG)#(mC)#(mA)(fA)(mU)(fA)(mA)(fU)(mA)(fC)(mC)(mU)(mG)(fC)#(mU)#(mA)-TegChol |

|                     |                                                                                                   |                                                                                      |
|---------------------|---------------------------------------------------------------------------------------------------|--------------------------------------------------------------------------------------|
| MSH3_2190           | P(mU)#(fG)#(mG)(fA)(fA)(fG)(mU)(fC)(mA)(fG)(mA)(fA)(mA)(fG)#(mG)#(fU)#(mC)#(mU)#(mU)#(fU)#(mU)    | (mA)#(mC)#(mC)(fU)(mU)(fU)(mC)(fU)(mG)(fA)(mC)(mU)(mU)(fC)#(mC)#(mA)-TegChol         |
| MSH3_2199           | P(mU)#(fU)#(mU)(fA)(fU)(fU)(mA)(fA)(mA)(fG)(mG)(fG)(mA)(fA)#(mG)#(fU)#(mC)#(mA)#(mG)#(fA)#(mU)    | (mA)#(mC)#(mU)(fU)(mC)(fC)(mC)(fU)(mU)(fU)(mA)(mA)(mC)(fU)#(mA)#(mA)-TegChol         |
| MSH3_2339           | P(mU)#(fA)#(mG)(fA)(fG)(fU)(mU)(fC)(mU)(fU)(mU)(fA)(mU)(fU)#(mU)#(fC)#(mU)#(mA)#(mU)#(fC)#(mU)    | (mG)#(mA)#(mA)(fA)(mU)(fA)(mA)(fA)(mG)(fA)(mA)(mC)(mU)(fC)#(mU)#(mA)-TegChol         |
| MSH3_2713           | P(mU)#(fA)#(mA)(fA)(fU)(fC)(mU)(fG)(mU)(fA)(mU)(fU)(mA)(fU)#(mU)#(fU)#(mG)#(mG)#(mG)#(fA)#(mU)    | (mA)#(mA)#(mA)(fU)(mA)(fA)(mU)(fA)(mC)(fA)(mG)(mA)(mU)(fU)#(mU)#(mA)-TegChol         |
| MSH3_2790           | P(mU)#(fC)#(mA)(fA)(fC)(fU)(mU)(fG)(mU)(fU)(mU)(fU)(mA)(fU)#(mG)#(fU)#(mA)#(mG)#(mG)#(fA)#(mU)    | (mA)#(mC)#(mA)(fU)(mA)(fA)(mA)(fA)(mC)(fA)(mA)(mG)(mU)(fU)#(mG)#(mA)-TegChol         |
| MSH3_2975           | P(mU)#(fC)#(mA)(fA)(fG)(fG)(mA)(fC)(mU)(fG)(mU)(fG)(mA)(fU)#(mG)#(fU)#(mU)#(mG)#(mC)#(fU)#(mU)    | (mA)#(mC)#(mA)(fU)(mC)(fA)(mC)(fA)(mG)(fU)(mC)(mC)(mU)(fU)#(mG)#(mA)-TegChol         |
| MSH3_3080           | P(mU)#(fC)#(mA)(fG)(fG)(fG)(mU)(fU)(mA)(fA)(mG)(fG)(mA)(fU)#(mU)#(fU)#(mC)#(mA)#(mC)#(fA)#(mU)    | (mA)#(mA)#(mA)(fU)(mC)(fC)(mU)(fU)(mA)(fA)(mC)(mC)(mC)(fU)#(mG)#(mA)-TegChol         |
| MSH3_3261           | P(mU)#(fU)#(mC)(fC)(fU)(fU)(mG)(fC)(mU)(fG)(mC)(fA)(mA)(fU)#(mU)#(fC)#(mC)#(mU)#(mC)#(fU)#(mU)    | (mG)#(mA)#(mA)(fU)(mU)(fG)(mC)(fA)(mG)(fC)(mA)(mA)(mG)(fG)#(mA)#(mA)-TegChol         |
| MSH3_3270           | P(mU)#(fA)#(mU)(fC)(fC)(fA)(mU)(fA)(mA)(fC)(mU)(fC)(mU)(fU)#(mU)#(fG)#(mC)#(mU)#(mG)#(fC)#(mU)    | (mC)#(mA)#(mA)(fG)(mG)(fA)(mG)(fU)(mU)(fA)(mU)(mG)(mU)(fU)#(mU)#(mA)-TegChol         |
| MSH3_3401           | P(mU)#(fC)#(mA)(fU)(fC)(fG)(mU)(fC)(mC)(fA)(mU)(fA)(mA)(fC)#(mU)#(fU)#(mU)#(mG)#(mC)#(fA)#(mU)    | (mA)#(mA)#(mG)(fU)(fA)(mU)(fG)(mG)(fA)(mC)(mG)(mA)(fU)#(mG)#(mA)-TegChol             |
| MSH3_3464           | P(mU)#(fA)#(mG)(fA)(fA)(fG)(mU)(fC)(mU)(fG)(mU)(fG)(mU)(fU)#(mU)#(fC)#(mU)#(mU)#(mC)#(fC)#(mU)    | (mG)#(mA)#(mA)(fA)(mC)(fA)(mC)(fA)(mG)(fA)(mC)(mU)(mU)(fC)#(mU)#(mA)-TegChol         |
| MSH3_3559           | P(mU)#(fA)#(mA)(fG)(fA)(fU)(mG)(fG)(mG)(fC)(mU)(fG)(mU)(fU)#(mA)#(fC)#(mU)#(mG)#(mG)#(fA)#(mU)    | (mG)#(mU)#(mA)(fA)(mC)(fA)(mG)(fC)(mC)(fU)(mA)(mU)(mC)(fU)#(mU)#(mA)-TegChol         |
| MSH3_3588           | P(mU)#(fG)#(mU)(fC)(fA)(fU)(mA)(fA)(mU)(fU)(mU)(fU)(mA)(fU)#(mG)#(fC)#(mU)#(mC)#(mA)#(fC)#(mU)    | (mG)#(mC)#(mA)(fU)(mA)(fA)(mA)(fA)(mU)(fU)(mA)(mU)(mG)(fA)#(mC)#(mA)-TegChol         |
| MSH3_3621           | P(mU)#(fA)#(mA)(fA)(fC)(fC)(mU)(fC)(mU)(fG)(mU)(fU)#(mU)#(fC)#(mC)#(mA)#(mA)#(fU)#(mU)            | (mG)#(mA)#(mA)(fA)(mC)(fA)(mG)(fA)(mG)(fA)(mG)(mG)(mU)(fU)#(mU)#(mA)-TegChol         |
| MSH3_3694           | P(mU)#(fG)#(mG)(fA)(fA)(fG)(mU)(fC)(mU)(fA)(mU)(fU)(mC)(fA)#(mA)#(fG)#(mA)#(mG)#(mU)#(fG)#(mU)    | (mC)#(mU)#(mU)(fG)(mA)(fA)(mU)(fA)(mG)(fA)(mC)(mU)(mU)(fC)#(mC)#(mA)-TegChol         |
| MSH3_3715           | P(mU)#(fA)#(mA)(fA)(fA)(fU)(mU)(fU)(mU)(fC)(mU)(fA)(mA)(fU)#(mU)#(fA)#(mC)(mA)#(mA)#(fA)#(mU)     | (mU)#(mA)#(mA)(fU)(mU)(fA)(mG)(fA)(mA)(fA)(mA)(mU)(mU)(fU)#(mU)#(mA)-TegChol         |
| MSH3_3761           | P(mU)#(fG)#(mG)(fA)(fA)(fU)(mU)(fA)(mU)(fA)(mU)(fU)(mC)(fU)#(mG)#(fC)#(mC)#(mA)#(mC)#(fU)#(mU)    | (mG)#(mC)#(mA)(fG)(mA)(fA)(mU)(fA)(mU)(fA)(mA)(mU)(mU)(fC)#(mC)#(mA)-TegChol         |
| MSH3_3818           | P(mU)#(fU)#(mG)(fA)(fA)(fC)(mU)(fG)(mA)(fA)(mA)(fC)(mA)(fA)#(mA)#(fU)#(mA)#(mA)#(mA)#(fA)#(mU)    | (mA)#(mU)#(mU)(fU)(mG)(fU)(mU)(fU)(mC)(fA)(mG)(mU)(mU)(fC)#(mA)#(mA)-TegChol         |
| MSH3_3870           | P(mU)#(fA)#(mA)(fC)(fA)(fA)(mU)(fC)(mU)(fU)(mC)(fA)(mA)(fU)#(mG)#(fG)#(mA)#(mU)#(mA)#(fG)#(mU)    | (mC)#(mC)#(mA)(fU)(mU)(fG)(mA)(fA)(mC)(fU)(mA)(mA)(mA)(fA)#(mU)#(mA)-TegChol         |
| MSH3_3876           | P(mU)#(fA)#(mA)(fA)(fA)(fU)(mU)(fA)(mU)(fU)(mU)(fU)(mA)(fG)#(mU)#(fU)#(mC)#(mA)#(mA)#(fU)#(mU)    | (mA)#(mA)#(mC)(fU)(mA)(fA)(mA)(fA)(mU)(fA)(mA)(mU)(mU)(fU)#(mU)#(mA)-TegChol         |
| MSH3_4283           | P(mU)#(fU)#(mU)(fG)(fA)(fU)(mA)(fA)(mU)(fU)(mC)(fU)(mA)(fU)#(mU)#(fU)#(mC)#(mU)#(mU)#(fU)#(mU)    | (mA)#(mA)#(mA)(fU)(mA)(fG)(mA)(fA)(mU)(fU)(mA)(mU)(mC)(fA)#(mA)#(mA)-TegChol         |
| MSH3_4315           | P(mU)#(fC)#(mU)(fU)(fA)(fU)(mU)(fC)(mC)(fU)(mU)(fC)(mU)(fG)#(mU)#(fG)#(mC)#(mU)#(mC)#(fU)#(mU)    | (mC)#(mA)#(mC)(fA)(mG)(fA)(mA)(fG)(mG)(fA)(mA)(mU)(mA)(fA)#(mG)#(mA)-TegChol         |
| MSH3_4320           | P(mU)#(fA)#(mU)(fG)(fA)(fC)(mC)(fU)(mU)(mU)(fU)(mC)(fC)#(mU)#(fU)#(mC)#(mA)#(mG)#(fU)#(mU)        | (mA)#(mA)#(mG)(fG)(mA)(fA)(mU)(fA)(mA)(fG)(mG)(mU)(mC)(fA)#(mU)#(mA)-TegChol         |
| MSH3_4336           | P(mU)#(fU)#(mA)(fA)(fC)(fC)(mU)(fU)(mU)(fU)(mA)(fA)(mA)(fU)#(mU)#(fU)#(mC)#(mA)#(mU)#(fG)#(mU)    | (mA)#(mA)#(mA)(fU)(mU)(fU)(mA)(fA)(mA)(fA)(mG)(mG)(mU)(fU)#(mA)#(mA)-TegChol         |
| MSH3_4371           | P(mU)#(fA)#(mC)(fA)(fA)(fU)(mC)(fU)(mU)(fU)(mA)(fA)(mA)(fC)#(mU)#(fG)#(mC)#(mU)#(mU)#(fA)#(mU)    | (mC)#(mA)#(mG)(fU)(mU)(fU)(mA)(fA)(mA)(fG)(mA)(mU)(mU)(fG)#(mU)#(mA)-TegChol         |
| MSH3_4372           | P(mU)#(fA)#(mA)(fC)(fA)(fA)(mU)(fC)(mU)(fU)(mU)(fA)(mA)(fA)#(mC)#(fU)#(mG)#(mC)#(mU)#(fU)#(mU)    | (mA)#(mG)#(mU)(fU)(mU)(fA)(mA)(fA)(mG)(fA)(mU)(mU)(mG)(fU)#(mU)#(mA)-TegChol         |
| MSH3_4379           | P(mU)#(fU)#(mU)(fC)(fA)(fU)(mC)(fC)(mA)(fA)(mC)(fA)(mA)(fU)#(mC)#(fU)#(mU)#(mU)#(mA)#(fA)#(mU)    | (mA)#(mG)#(mA)(fU)(mU)(fG)(mU)(fU)(mG)(fG)(mA)(mU)(mG)(fA)#(mA)#(mA)-TegChol         |
| MSH3_4410           | P(mU)#(fA)#(mU)(fA)(fU)(fU)(mU)(fA)(mU)(fU)(mA)(fC)(mU)(fU)#(mG)#(fA)#(mA)#(mU)#(mG)#(fA)#(mU)    | (mU)#(mC)#(mA)(fA)(mG)(fU)(mA)(fA)(mU)(fA)(mA)(mA)(mU)(fA)#(mU)#(mA)-TegChol         |
| NTC_P3_in vitro     | P(mU)#(fA)#(mA)(fU)(fC)(fG)(mU)(fA)(mU)(fU)(mU)(fG)(mU)#(fC)#(mA)#(fA)#(mU)#(mC)#(fA)#(mU)        | (mG)#(mA)#(mU)(mU)(mG)(fA)(mC)(fA)(mA)(fA)(mU)(fA)(mC)(mG)(mA)(fU)#(mU)#(mA)-TegChol |
| MSH3_1000 in vivo   | V(mU)#(fG)#(mC)(fA)(fG)(fU)(mU)(fU)(mC)(fA)(mG)(fU)(fU)#(mG)#(fC)(mU)#(mU)#(mC)#(fA)#(mU)         | (mG)#(mC)#(mA)(fA)(mA)(fC)(mU)(fG)(mA)(fA)(mA)(mC)(mU)(fG)#(mC)#(mA)-DIO             |
| HTT_10150_in vivo   | V(mU)#(fU)#(mA)(fA)(fU)(fC)(mU)(fC)(mU)(fU)(mU)(fA)(mC)(fU)#(mG)#(fA)#(mU)#(mA)#(mU)#(fA)#(mU)    | (mU)#(mC)#(mA)(fG)(mU)(fA)(mA)(fA)(mG)(fA)(mG)(mA)(mU)(fU)#(mA)#(mA)-DIO             |
| NTC_P3_AS 21mer     | V(mU)#(fA)#(mA)(fU)(fC)(fG)(mU)(fA)(mU)(fU)(mU)(fG)(mU)(fC)#(mA)#(fA)#(mU)#(mC)#(mA)#(fU)#(mU)    | (mU)#(mU)#(mG)(fA)(mC)(fA)(mA)(fA)(mU)(fA)(mC)(mG)(mA)(fU)#(mU)#(mA)-DIO             |
| HTT_10150_in vivo 2 | V(mU)#(fU)(mU)(fA)(fA)(fU)(fC)(mU)(fC)(mU)(fU)(mU)(fA)(mC)(fU)#(mG)#(fA)#(mU)#(mA)#(mU)#(mA)#(fU) | (mU)#(mC)#(mA)(fG)(mU)(fA)(mA)(fA)(mG)(fA)(mG)(mA)(mU)(fU)#(mA)#(mA)-DIO             |
| NTC_P3_AS 21mer     | V(mU)#(fA)#(mA)(fU)(fC)(fG)(mU)(fA)(mU)(fU)(mU)(fG)(mU)(fC)#(mA)#(fA)#(mU)#(mC)#(mA)#(mU)#(fU)    | (mU)#(mU)#(mG)(fA)(mC)(fA)(mA)(fA)(mU)(fA)(mC)(mG)(mA)(fU)#(mU)#(mA)-DIO             |

**Table S2: Summary of Mouse Strain, Genotype and CAG level**

Please see the attached excel document for the full list of genotypes and mouse strain information
